# Supplementary material
Source: MDPI journal article supplement (https://www.mdpi.com/2071-1050/6/3/1386)
Supplement: s1 [file s1]

## Sheet: Sheet1
Supplementary Information for "Integrated Metrics for Improving the Life Cycle Approach to Assessing Product System Sustainability"
Authors: Wesley Ingwersen, Heriberto Cabezas, Anne V. Weisbrod, Tarsha Eason, Bayou Demeke, Xin (Cissy) Ma, Troy Hawkins, Seung-Jin Lee, Jane C. Bare, Manuel Ceja
Illustration of Integrated Metrics Section 2.3-2.4
Instructions: Alter the values for greenhouse gases (GHGs) and/or land occupation (LO) for Options 1 and 2 (yellow cells) and see how this affects relative sustainability of Option 1 versus Option 2 with respect the ecological footprint integrated metric (EF)
Step 1 Alter values for GHG and/or LO for Option 1 or 2
Metric	Option 1	Option 2	Units
GHG	110	150	kg CO2eq	∂EF/∂GHG
EF of GHG	11	15	gha	0.4
LO	10	8	ha	∂EF/∂LO
EF of LO	12	9.6	gha	-0.666667
Total EF	23	24.6	gha
Step 2 Intepretation of Equations - In this illustration the user or client has determined that Option 1 must emit less GHGs and have a smaller EF than Option 2 in order to be more sustainable
Defined Criteria	Option 1 More Sustainable?	Reference Equation
GHG of option 1 < GHG of option 2	TRUE	(13)
Two remaining criteria (At least one must be true for Option 1 to be more sustainable)
Both LO and GHG of Option 1 < Option 2	FALSE	(9)
∂EF/∂LO < ∂EF/∂GHG	TRUE	(10)
KEY
LO = Land occupation
GHG = Greenhouse Gases
EF = Ecological Footprint
